# Supplementary material
Source: HighWire-hosted journal article supplement (https://bmjopen.bmj.com/content/9/6/e025003)
Supplement: inline-supplementary-material-2 [file inline-supplementary-material-2.pdf]

**Supplementary file 2: Psychological well-being and their interpretations; adapted from McCarthy et al<sup>27</sup>**

---

| <b>Psychological and behavioural scales</b>                            | <b>Score range and interpretation</b>                                                                                                                                         |
|------------------------------------------------------------------------|-------------------------------------------------------------------------------------------------------------------------------------------------------------------------------|
| <b>Short form of the State Trait Anxiety Index (STAI)<sup>24</sup></b> | Short –form STAI scores 6-24 converted to a score range of 20-80 to mimic the full version of the STAI, with high scores indicating high state anxiety (i.e. current anxiety) |
| <b>Perceived Stress Scale (PSS)<sup>25</sup></b>                       | 0-40, with high scores representing higher perceived stress (feelings of lack of control)                                                                                     |
| <b>Edinburgh Postnatal Depression Scale (EPDS)<sup>26</sup></b>        | As a continuous measure (0-30) where a higher score indicates a higher probability of depression                                                                              |
| <b>Behavioural response to pregnancy scale<sup>27</sup></b>            | Two subscales: <ol style="list-style-type: none"><li>1. Limiting/resting behaviour (0-20)<sup>a</sup></li><li>2. All-or-nothing behaviour (0-28)<sup>b</sup></li></ol>        |

---

<sup>a</sup>**Limiting response includes:** *avoiding exercise, life on hold, avoiding usual activities, going to bed during the day, not being able to do usual level of activities.*

<sup>b</sup>**All-or-nothing response includes:** *overdoing and needing to rest, pushing oneself, carrying on as normal, doing too much.*

---
